# Supplementary material for: Dissolving microneedle-encapsulated drug-loaded nanoparticles and recombinant humanized collagen type III for the treatment of chronic wound via anti-inflammation and enhanced cell proliferation and angiogenesis
Source: Royal Society of Chemistry journal article supplement (doi:10.1039/d1nr07708b), 2022-01-01
Supplement: d1nr07708b1.pdf [file d1nr07708b1.pdf]

# **Dissolving Microneedles Encapsulating Drug-Loaded Nanoparticles and Recombinant Humanized Collagen Type III for the Treatment of Chronic Wound via Anti- inflammation and Enhanced Cell Proliferation and Angiogenesis**

**Lin-yu Long<sup>a</sup>, Wenqi Liu<sup>a</sup>, Li Li<sup>c</sup>, Cheng Hu<sup>a</sup>, Shuyi He<sup>a</sup>, Lu Lu<sup>b</sup>, Jian Wang<sup>d</sup>, Li Yang<sup>a,\*</sup>, Yun-  
bing Wang<sup>a,\*</sup>**

<sup>a</sup>National Engineering Research Center for Biomaterials, Chuanda-Jinbo Joint Research Center, Sichuan University, Chengdu, 610064, China

<sup>b</sup>Key Laboratory of Medical Molecular Virology (MOE/NHC/CAMS), School of Basic Medical Sciences and Shanghai Public Health Clinical Center, Fudan-Jinbo Joint Research Center, Fudan University, Shanghai, 200302, China

<sup>c</sup>Institute of Clinical Pathology, West China Hospital of Sichuan University, Chengdu, 610041, China

<sup>d</sup>Shanxi Jinbo Bio-Pharmaceutical Co., Ltd, Taiyuan, 030032, China

\*Correspondence: yanglisc@scu.edu.cn; yunbing.wang@scu.edu.cn

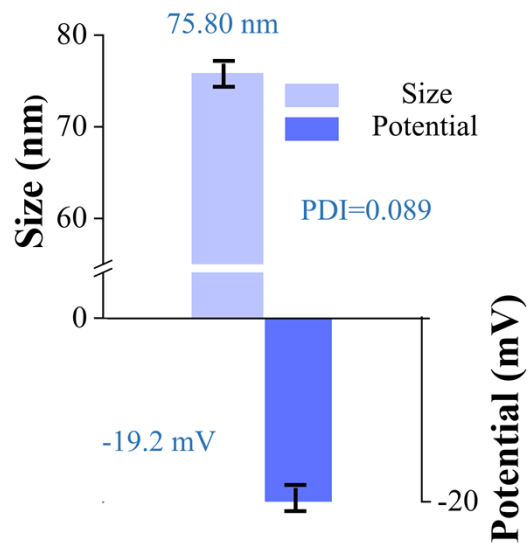

**Figure S1.** Size distribution and zeta potential of the Nap@PLGA in H<sub>2</sub>O.

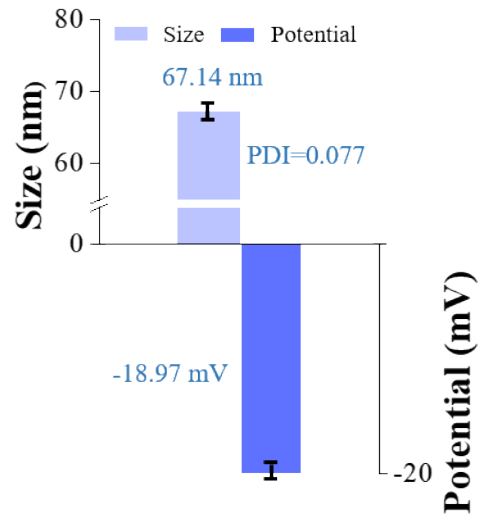

**Figure S2.** Size distribution and zeta potential of the PLGA nanoparticles in H<sub>2</sub>O.

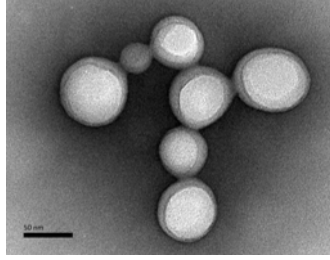

**Figure S3.** The TEM images of PLGA nanoparticles, scale bar is 50 nm.

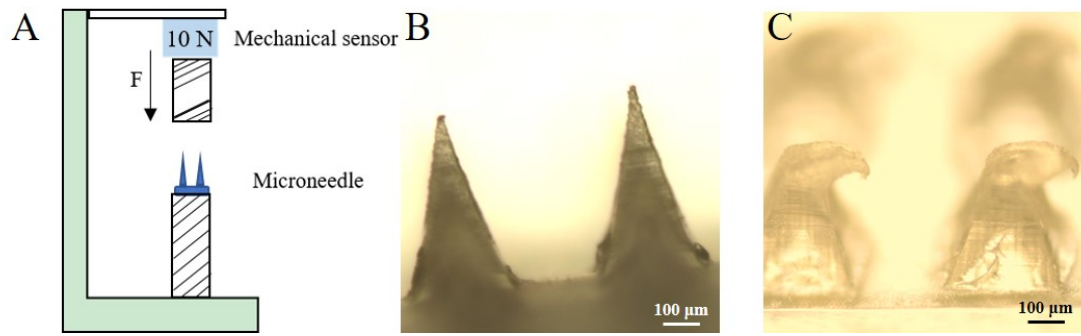

**Figure S4.** (A) Schematic diagram of mechanical performance test of MN. The optical image of MN before (B) and after (C) compression.

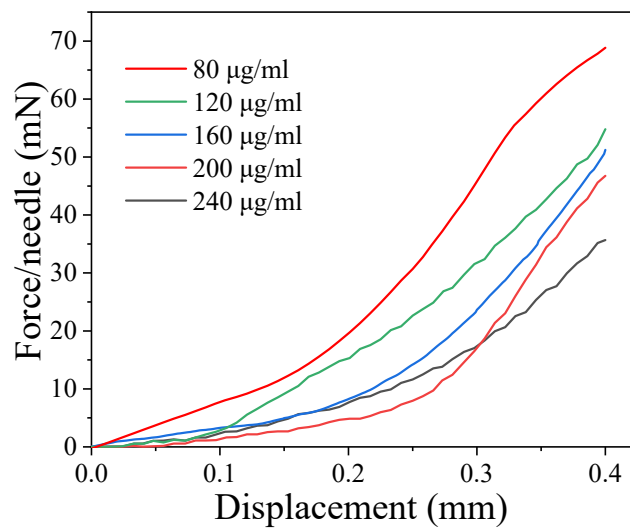

**Figure S5.** Mechanical strength of the MN patch with different concentrations of Nap@PLGA nanoparticles

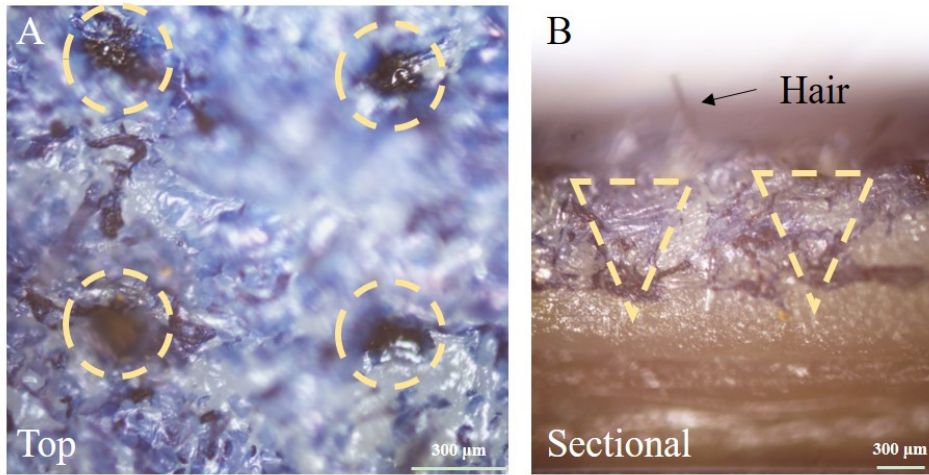

**Figure S6.** The optical micrograph of the mice skin stained with trypan blue after MN-III/Nap application: A) Top; B) Sectional.

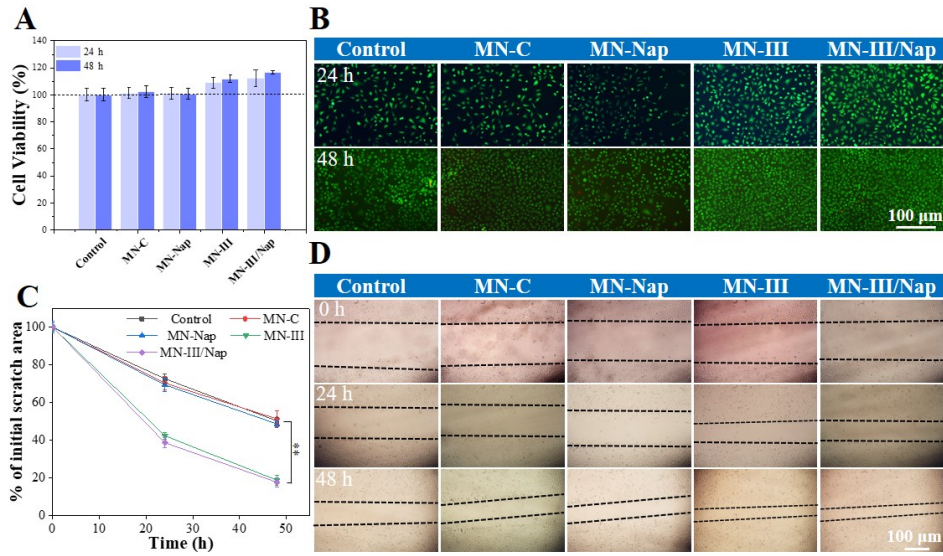

**Figure S7.** Cell viability (A) and live/dead staining (B) of HUVECs after incubating with MN solution for 24 h and 48 h. The quantitative analysis (C) and pictures (D) of the cell wound scratch assay of HUVECs at different times. \*P < .01, \*\*P < .001.
